# Supplementary material for: Reliability and Validity of the Emotional Eater Questionnaire in Romanian Adults
Source: MDPI journal article supplement (doi:10.3390/nu15010026), 2022-12-21
Supplement: s1 [file s1]

**Table S1: The Emotional Eater Questionnaire (English/Romanian version)**

**Putnoky et al**

**Emotional Eater Questionnaire – Romanian validation**

| No | Questions                                                                                                                         | Întrebări                                                                                                                          |
|----|-----------------------------------------------------------------------------------------------------------------------------------|------------------------------------------------------------------------------------------------------------------------------------|
| 1  | Do the weight scales have a great power over you? Can they change your mood?                                                      | Cântarul are o mare putere asupra ta? Îți poate schimba starea de spirit?                                                          |
| 2  | Do you crave specific foods?                                                                                                      | Poftești anumite alimente?                                                                                                         |
| 3  | Is it difficult for you to stop eating sweet things, especially chocolate?                                                        | Îți este greu să nu mai consumi dulciuri, în special ciocolată?                                                                    |
| 4  | Do you have problems controlling the amount of certain types of food you eat?                                                     | Ai probleme în a controla cantitatea anumitor tipuri de alimente pe care le consumi?                                               |
| 5  | Do you eat when you are stressed, angry or bored?                                                                                 | Mănânci când ești stresat, furios sau plictisit?                                                                                   |
| 6  | Do you eat more of your favourite food and with less control when you are alone?                                                  | Mănânci mai mult din mâncarea preferată și cu mai puțin control atunci când ești singur?                                           |
| 7  | Do you feel guilty when eat “forbidden” foods, like sweets or snacks?                                                             | Te simți vinovat când mănânci alimente „interzise”, cum ar fi dulciurile sau gustările?                                            |
| 8  | Do you feel less control over your diet when you are tired after work at night?                                                   | Ai mai puțin control asupra ceea ce mănânci când ești obosit seara, după muncă?                                                    |
| 9  | When you overeat while on a diet, do you give up and start eating without control, particularly food that you think is fattening? | Când ești la dietă, se întâmplă să renunți și să începi să mănânci fără control, în special alimente despre care crezi că îngrașă? |
| 10 | How often do you feel that food controls you, rather than you controlling food?                                                   | Cât de des simți că mâncarea te controlează, în loc să controlezi tu mâncarea?                                                     |
